# Supplementary material for: Evaluation of Intra- and Interobserver Reproducibility of the New AO/OTA Classification for Distal Radius Fractures Compared with the Fernandez Classification
Source: PubMed Central journal article supplement — Rev Bras Ortop (Sao Paulo). 2022 Sep 26;57(6):917–23. doi: 10.1055/s-0041-1740471 (PMC9757955; doi:10.1055/s-0041-1740471), 2022-09-26
Supplement: 10-1055-s-0041-1740471-s2100085_en.pdf [file 10-1055-s-0041-1740471-s2100085_en.pdf]

Appendix 1 AO/OTA Fracture and Dislocation Classification – Distal Radial Fracture

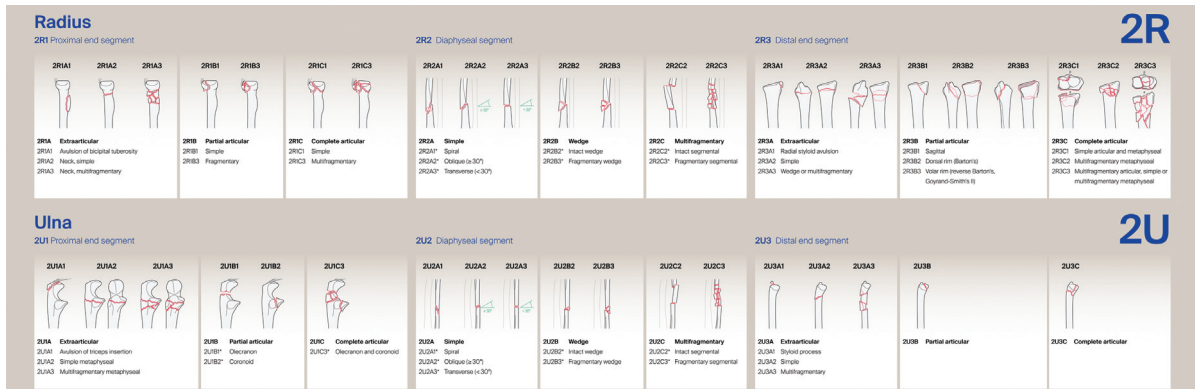

Appendix 2 Block of Questions for each Radiograph of the Qualtrics Questionnaire

DO YOU CLASSIFY THE ABOVE FRACTURE BY FERNANDEZ AS:

- TYPE 1
- TYPE 2
- TYPE 3
- TYPE 4
- TYPE 5

YOUR PREFERENCE FOR TREATMENT OF THIS FRACTURE IS:

- REDUCTION AND CONSERVATIVE TREATMENT (GYPSUM)
- REDUCTION AND PERCUTANEOUS PINING
- SURGICAL REDUCTION AND FIXATION WITH PALMAR “T” PLATE ASSOCIATED OR NOT WITH KIRSCHNER THREADS
- SURGICAL REDUCTION AND FIXATION WITH LOCKED VOLAR PLATE
- SURGICAL REDUCTION AND FIXATION WITH LOCKED DORSAL PLATE
- OTHERS

DO YOU CLASSIFY THE ABOVE FRACTURE BY AO/OTA 2018 AS:

|                | Classify according to distal radius fracture |                       |                       |                       |                       |                       |                       |                       |                       | Classify according to distal ulna fracture |                       |                       |                       |                       |                       |
|----------------|----------------------------------------------|-----------------------|-----------------------|-----------------------|-----------------------|-----------------------|-----------------------|-----------------------|-----------------------|--------------------------------------------|-----------------------|-----------------------|-----------------------|-----------------------|-----------------------|
|                | 2R3A1                                        | 2R3A2                 | 2R3A3                 | 2R3B1                 | 2R3B2                 | 2R3B3                 | 2R3C1                 | 2R3C2                 | 2R3C3                 | 2U3A1                                      | 2U3A2                 | 2U3A3                 | 2U3B                  | 2U3C                  | Not applicable        |
| Classification | <input type="radio"/>                        | <input type="radio"/> | <input type="radio"/> | <input type="radio"/> | <input type="radio"/> | <input type="radio"/> | <input type="radio"/> | <input type="radio"/> | <input type="radio"/> | <input type="radio"/>                      | <input type="radio"/> | <input type="radio"/> | <input type="radio"/> | <input type="radio"/> | <input type="radio"/> |

FOLLOWING THE UNIVERSAL LIST OF COMPATIBLE MODIFIERS FOR DISTAL RADIO FRACTURE, HOW DO YOU I WOULD CLASSIFY THE FRACTURE ABOVE USING THE 2018 AO/OTA CLASSIFICATION MODIFIERS (You CAN SELECT MORE THAN ONE OPTION):

- NOT APPLICABLE
- 1 - NOT DIVERTED
- 2 - DIVERTED
- 3a - ARTICULAR IMPACT
- 3b - METAPHYSAL IMPACT
- 4 - NOT IMPACTED
- 5th - PREVIOUS DEVIATION (VOLAR)
- 5b - POSTERIOR DEVIATION (DORSAL)
- 5c - ULNAR DEVIATION
- 5d - RADIAL DEVIATION
- 5e - MULTIDIRECTIONAL DEVIATION
- 6a - SUBLUXATION - VOLAR LIGAMENT INSTABILITY
- 6b - SUBLUXATION - DORSAL LIGAMENT INSTABILITY
- 6c - SUBLUXATION - ULNAR LIGAMENT INSTABILITY
- 6d - SUBLUXATION - RADIAL LIGAMENT INSTABILITY
- 6e - SUBLUXATION - MULTIDIRECTIONAL LIGAMENT INSTABILITY
- 7 - DIAPHYSEAL EXTENSION
- 8 - LOW BONE QUALITY

WOULD YOU CHANGE THE TREATMENT OPTION AFTER CLASSIFYING THIS FRACTURE BY AO/OTA 2018:

- YES, I WOULD CHANGE MY TREATMENT
- NO, I WOULD KEEP THE PREVIOUS TREATMENT

Appendix 3 Inter- and intra-observer agreement table

| Mean interobserver agreement            |                              |                           |                                         |                                       |                                            |                         |
|-----------------------------------------|------------------------------|---------------------------|-----------------------------------------|---------------------------------------|--------------------------------------------|-------------------------|
|                                         | FERNANDEZ CLASSIFICATION (%) | ELECTION OF TREATMENT (%) | CLASSIFICATION AO/OTA 2018 - RADIUM (%) | CLASSIFICATION AO/OTA 2018 - ULNA (%) | CLASSIFICATION AO/OTA 2018 - MODIFIERS (%) | CHANGE OF TREATMENT (%) |
| 1                                       | 90                           | 60                        | 50                                      | 100                                   | 60                                         | 100                     |
| 2                                       | 90                           | 60                        | 70                                      | 100                                   | 50                                         | 90                      |
| 3                                       | 80                           | 80                        | 70                                      | 90                                    | 40                                         | 100                     |
| 4                                       | 50                           | 60                        | 40                                      | 100                                   | 70                                         | 90                      |
| 5                                       | 100                          | 50                        | 80                                      | 100                                   | 60                                         | 80                      |
| 6                                       | 70                           | 40                        | 50                                      | 90                                    | 50                                         | 100                     |
| 7                                       | 60                           | 50                        | 40                                      | 80                                    | 60                                         | 100                     |
| 8                                       | 70                           | 50                        | 50                                      | 100                                   | 50                                         | 100                     |
| 9                                       | 70                           | 70                        | 50                                      | 90                                    | 50                                         | 90                      |
| 10                                      | 80                           | 70                        | 70                                      | 90                                    | 40                                         | 100                     |
| 11                                      | 100                          | 80                        | 60                                      | 50                                    | 40                                         | 90                      |
| 12                                      | 100                          | 80                        | 70                                      | 90                                    | 40                                         | 100                     |
| 13                                      | 60                           | 70                        | 60                                      | 50                                    | 50                                         | 100                     |
| 14                                      | 90                           | 60                        | 80                                      | 90                                    | 40                                         | 100                     |
| 15                                      | 80                           | 50                        | 90                                      | 100                                   | 50                                         | 100                     |
| 16                                      | 50                           | 40                        | 40                                      | 60                                    | 70                                         | 100                     |
| 17                                      | 90                           | 60                        | 40                                      | 40                                    | 90                                         | 100                     |
| 18                                      | 40                           | 70                        | 50                                      | 90                                    | 40                                         | 100                     |
| 19                                      | 60                           | 80                        | 30                                      | 60                                    | 50                                         | 80                      |
| 20                                      | 50                           | 90                        | 40                                      | 80                                    | 50                                         | 100                     |
| 21                                      | 50                           | 80                        | 40                                      | 60                                    | 60                                         | 100                     |
| 22                                      | 80                           | 90                        | 30                                      | 100                                   | 70                                         | 100                     |
| 23                                      | 60                           | 80                        | 40                                      | 90                                    | 60                                         | 90                      |
| 24                                      | 100                          | 50                        | 70                                      | 100                                   | 40                                         | 90                      |
| 25                                      | 90                           | 60                        | 50                                      | 100                                   | 70                                         | 90                      |
| 26                                      | 100                          | 50                        | 60                                      | 100                                   | 70                                         | 100                     |
| 27                                      | 90                           | 70                        | 50                                      | 90                                    | 70                                         | 80                      |
| 28                                      | 40                           | 40                        | 100                                     | 50                                    | 60                                         | 100                     |
| 29                                      | 50                           | 40                        | 60                                      | 100                                   | 50                                         | 90                      |
| 30                                      | 60                           | 40                        | 80                                      | 80                                    | 50                                         | 100                     |
| 31                                      | 70                           | 50                        | 40                                      | 90                                    | 40                                         | 100                     |
| 32                                      | 60                           | 40                        | 40                                      | 90                                    | 40                                         | 100                     |
| 33                                      | 100                          | 60                        | 80                                      | 90                                    | 50                                         | 90                      |
| 34                                      | 100                          | 40                        | 60                                      | 80                                    | 40                                         | 100                     |
| 35                                      | 70                           | 50                        | 60                                      | 100                                   | 50                                         | 80                      |
| 36                                      | 100                          | 40                        | 60                                      | 70                                    | 60                                         | 100                     |
| 37                                      | 60                           | 50                        | 40                                      | 80                                    | 50                                         | 100                     |
| 38                                      | 90                           | 100                       | 40                                      | 80                                    | 60                                         | 100                     |
| 39                                      | 70                           | 70                        | 70                                      | 50                                    | 50                                         | 100                     |
| 40                                      | 60                           | 60                        | 80                                      | 80                                    | 60                                         | 100                     |
| 41                                      | 70                           | 60                        | 60                                      | 80                                    | 50                                         | 100                     |
| 42                                      | 100                          | 70                        | 100                                     | 70                                    | 60                                         | 90                      |
| 43                                      | 70                           | 80                        | 70                                      | 90                                    | 50                                         | 90                      |
| 44                                      | 90                           | 70                        | 90                                      | 80                                    | 40                                         | 90                      |
| 45                                      | 90                           | 50                        | 70                                      | 40                                    | 50                                         | 90                      |
| 46                                      | 90                           | 70                        | 70                                      | 70                                    | 50                                         | 100                     |
| 47                                      | 90                           | 60                        | 50                                      | 50                                    | 50                                         | 90                      |
| 48                                      | 90                           | 80                        | 50                                      | 80                                    | 50                                         | 100                     |
| 49                                      | 80                           | 90                        | 50                                      | 80                                    | 40                                         | 100                     |
| 50                                      | 70                           | 50                        | 70                                      | 90                                    | 40                                         | 90                      |
| <b>Mean interobserver agreement (%)</b> | <b>76,4</b>                  | <b>62</b>                 | <b>59,2</b>                             | <b>81,200</b>                         | <b>52,6</b>                                | <b>95,4</b>             |

| Mean intraobserver agreement            |                              |                |                                         |                                       |                                            |                         |
|-----------------------------------------|------------------------------|----------------|-----------------------------------------|---------------------------------------|--------------------------------------------|-------------------------|
| EVALUATORS                              | FERNANDEZ CLASSIFICATION (%) | TREATMENT (%)  | CLASSIFICATION AO/OTA 2018 - RADIUM (%) | CLASSIFICATION AO/OTA 2018 - ULNA (%) | CLASSIFICATION AO/OTA 2018 - MODIFIERS (%) | CHANGE OF TREATMENT (%) |
| 1                                       | 77,78                        | 44,44          | 44,44                                   | 100                                   | 33,33                                      | 100                     |
| 2                                       | 100                          | 55,56          | 88,89                                   | 88,89                                 | 44,44                                      | 100                     |
| 3                                       | 77,78                        | 66,67          | 33,33                                   | 88,89                                 | 66,67                                      | 88,89                   |
| 4                                       | 55,56                        | 44,44          | 44,44                                   | 100                                   | 44,44                                      | 100                     |
| 5                                       | 88,89                        | 33,33          | 55,56                                   | 100                                   | 33,33                                      | 100                     |
| 6                                       | 77,78                        | 33,33          | 55,56                                   | 66,67                                 | 33,33                                      | 100                     |
| 7                                       | 44,44                        | 33,33          | 33,33                                   | 100                                   | 33,33                                      | 88,89                   |
| 8                                       | 88,89                        | 55,56          | 44,44                                   | 88,89                                 | 66,67                                      | 100                     |
| 9                                       | 77,78                        | 77,78          | 55,56                                   | 100                                   | 33,33                                      | 8,89                    |
| 10                                      | 77,78                        | 77,78          | 44,44                                   | 88,89                                 | 33,33                                      | 100                     |
| 11                                      | 77,78                        | 66,67          | 55,56                                   | 55,56                                 | 55,56                                      | 100                     |
| 12                                      | 100                          | 66,67          | 77,78                                   | 88,89                                 | 44,44                                      | 100                     |
| 13                                      | 77,78                        | 66,67          | 44,44                                   | 66,67                                 | 33,33                                      | 88,89                   |
| 14                                      | 88,89                        | 55,56          | 55,56                                   | 88,89                                 | 44,44                                      | 88,89                   |
| 15                                      | 100                          | 55,56          | 88,89                                   | 66,67                                 | 77,78                                      | 100                     |
| 16                                      | 55,56                        | 44,44          | 33,33                                   | 55,56                                 | 33,33                                      | 88,89                   |
| 17                                      | 88,89                        | 55,56          | 55,56                                   | 66,67                                 | 33,33                                      | 100                     |
| 18                                      | 33,33                        | 44,44          | 55,56                                   | 88,89                                 | 44,44                                      | 100                     |
| 19                                      | 55,55                        | 77,78          | 33,33                                   | 44,44                                 | 33,33                                      | 88,89                   |
| 20                                      | 66,67                        | 55,56          | 44,44                                   | 88,89                                 | 44,44                                      | 100                     |
| 21                                      | 55,56                        | 88,89          | 44,44                                   | 88,89                                 | 66,67                                      | 100                     |
| 22                                      | 77,78                        | 77,78          | 33,33                                   | 100                                   | 44,44                                      | 88,89                   |
| 23                                      | 66,67                        | 55,56          | 44,44                                   | 88,89                                 | 55,56                                      | 100                     |
| 24                                      | 77,78                        | 55,56          | 66,67                                   | 100                                   | 55,56                                      | 100                     |
| 25                                      | 88,89                        | 66,67          | 55,56                                   | 77,76                                 | 55,56                                      | 100                     |
| 26                                      | 100                          | 55,56          | 55,56                                   | 88,89                                 | 55,56                                      | 100                     |
| 27                                      | 100                          | 66,67          | 55,56                                   | 88,89                                 | 55,56                                      | 100                     |
| 28                                      | 44,44                        | 55,56          | 66,67                                   | 44,44                                 | 55,56                                      | 100                     |
| 29                                      | 55,56                        | 55,56          | 66,67                                   | 77,78                                 | 44,44                                      | 88,89                   |
| 30                                      | 100                          | 55,56          | 77,78                                   | 88,89                                 | 44,44                                      | 88,89                   |
| 31                                      | 55,56                        | 66,67          | 33,33                                   | 55,56                                 | 33,33                                      | 100                     |
| 32                                      | 100                          | 66,67          | 77,76                                   | 88,89                                 | 66,67                                      | 88,89                   |
| 33                                      | 100                          | 44,44          | 77,76                                   | 55,56                                 | 66,67                                      | 100                     |
| 34                                      | 100                          | 44,44          | 66,67                                   | 66,67                                 | 88,89                                      | 100                     |
| 35                                      | 66,67                        | 66,67          | 55,56                                   | 88,89                                 | 55,56                                      | 100                     |
| 36                                      | 100                          | 66,67          | 66,67                                   | 77,78                                 | 44,44                                      | 88,89                   |
| 37                                      | 66,67                        | 55,56          | 33,33                                   | 77,78                                 | 44,44                                      | 100                     |
| 38                                      | 77,78                        | 77,78          | 44,44                                   | 77,78                                 | 44,44                                      | 88,89                   |
| 39                                      | 55,56                        | 66,67          | 55,56                                   | 55,56                                 | 66,67                                      | 100                     |
| 40                                      | 66,67                        | 66,67          | 66,67                                   | 77,78                                 | 77,78                                      | 100                     |
| 41                                      | 55,56                        | 55,56          | 100                                     | 88,89                                 | 44,44                                      | 88,89                   |
| 42                                      | 100                          | 77,78          | 66,67                                   | 66,67                                 | 55,56                                      | 100                     |
| 43                                      | 55,56                        | 77,78          | 66,67                                   | 88,89                                 | 55,56                                      | 88,89                   |
| 44                                      | 88,89                        | 77,78          | 77,76                                   | 100                                   | 55,56                                      | 100                     |
| 45                                      | 77,78                        | 66,67          | 55,56                                   | 88,89                                 | 55,56                                      | 88,89                   |
| 46                                      | 100                          | 55,56          | 77,76                                   | 44,44                                 | 66,67                                      | 77,76                   |
| 47                                      | 77,78                        | 88,89          | 55,56                                   | 66,67                                 | 33,33                                      | 100                     |
| 48                                      | 88,89                        | 88,89          | 33,33                                   | 88,89                                 | 33,33                                      | 100                     |
| 49                                      | 88,89                        | 55,56          | 33,33                                   | 88,89                                 | 33,33                                      | 100                     |
| 50                                      | 66,67                        | 77,76          | 77,78                                   | 100                                   | 55,56                                      | 88,89                   |
| <b>Mean intraobserver agreement (%)</b> | <b>77,3348</b>               | <b>61,7794</b> | <b>56,6658</b>                          | <b>80,4454</b>                        | <b>49,5552</b>                             | <b>94,1778</b>          |
