# Supplementary material for: Evaluation of Intra- and Interobserver Reproducibility of the New AO/OTA Classification for Distal Radius Fractures Compared with the Fernandez Classification
Source: PubMed Central journal article supplement — Rev Bras Ortop (Sao Paulo). 2022 Sep 26;57(6):917–23. doi: 10.1055/s-0041-1740471 (PMC9757955; doi:10.1055/s-0041-1740471), 2022-09-26
Supplement: 10-1055-s-0041-1740471-s2100085_pt.pdf [file 10-1055-s-0041-1740471-s2100085_pt.pdf]

**Anexo 1** Classificação de Fratura e Luxação AO/OTA - Fratura Radial Distal

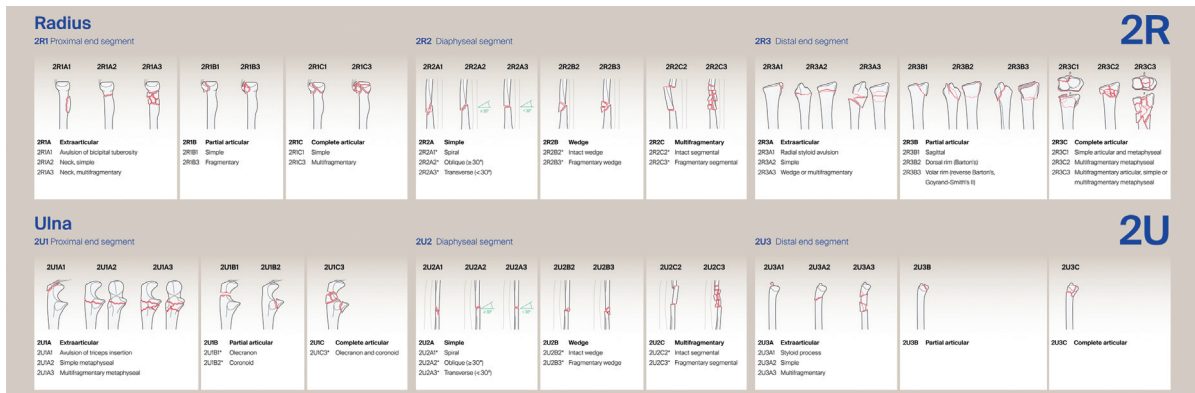

**Anexo 2** Bloco de Perguntas de cada Radiografia do Questionário Qualtrics

VOCÊ CLASSIFICA A FRATURA ACIMA POR FERNANDEZ COMO:

- TIPO 1
- TIPO 2
- TIPO 3
- TIPO 4
- TIPO 5

A SUA PREFERÊNCIA PARA O TRATAMENTO DESTA FRATURA É:

- REDUÇÃO E TRATAMENTO CONSERVADOR (GESSO)
- REDUÇÃO E PINAGEM PERCUTÂNEA
- REDUÇÃO CIRÚRGICA E FIXAÇÃO COM PLACA EM "T" PALMAR ASSOCIADA OU NÃO A FIOS DE KIRSCHNER
- REDUÇÃO CIRÚRGICA E FIXAÇÃO COM PLACA VOLAR BLOQUEADA
- REDUÇÃO CIRÚRGICA E FIXAÇÃO COM PLACA DORSAL BLOQUEADA
- OUTROS

VOCÊ CLASSIFICA A FRATURA ACIMA POR AO/OTA 2018 COMO:

| CLASSIFICAÇÃO | CLASSIFIQUE DE ACORDO COM A FRATURA EM RADIO DISTAL |                       |                       |                       |                       |                       |                       |                       |                       | CLASSIFIQUE DE ACORDO COM A FRATURA EM ULNA DISTAL |                       |                       |                       |                       |                       |
|---------------|-----------------------------------------------------|-----------------------|-----------------------|-----------------------|-----------------------|-----------------------|-----------------------|-----------------------|-----------------------|----------------------------------------------------|-----------------------|-----------------------|-----------------------|-----------------------|-----------------------|
|               | 2R3A1                                               | 2R3A2                 | 2R3A3                 | 2R3B1                 | 2R3B2                 | 2R3B3                 | 2R3C1                 | 2R3C2                 | 2R3C3                 | 2U3A1                                              | 2U3A2                 | 2U3A3                 | 2U3B                  | 2U3C                  | Não se aplica         |
|               | <input type="radio"/>                               | <input type="radio"/> | <input type="radio"/> | <input type="radio"/> | <input type="radio"/> | <input type="radio"/> | <input type="radio"/> | <input type="radio"/> | <input type="radio"/> | <input type="radio"/>                              | <input type="radio"/> | <input type="radio"/> | <input type="radio"/> | <input type="radio"/> | <input type="radio"/> |

SEGUINDO A LISTA UNIVERSAL DE MODIFICADORES COMPATÍVEIS PARA FRATURA DISTAL DE RÁDIO, COMO VOCÊ CLASSIFICARIA A FRATURA ACIMA UTILIZANDO OS MODIFICADORES DA CLASSIFICAÇÃO AO/OTA 2018 (PODE SELECIONAR MAIS DE UMA OPÇÃO):

- NÃO SE APLICA
- 1 - NÃO DESVIADA
- 2 - DESVIADA
- 3a - IMPACTAÇÃO ARTICULAR
- 3b - IMPACTAÇÃO METAFISÁRIA
- 4 - NÃO IMPACTADA
- 5a - DESVIADA ANTERIOR (VOLAR)
- 5b - DESVIADA POSTERIOR (DORSAL)
- 5c - DESVIADA ULNAR
- 5d - DESVIADA RADIAL
- 5e - DESVIADA MULTIDIRECIONAL
- 6a - SUBLUXAÇÃO - INSTABILIDADE LIGAMENTAR VOLAR
- 6b - SUBLUXAÇÃO - INSTABILIDADE LIGAMENTAR DORSAL
- 6c - SUBLUXAÇÃO - INSTABILIDADE LIGAMENTAR ULNAR
- 6d - SUBLUXAÇÃO - INSTABILIDADE LIGAMENTAR RADIAL
- 6e - SUBLUXAÇÃO - INSTABILIDADE LIGAMENTAR MULTIDIRECIONAL
- 7 - EXTENSÃO DIAFISÁRIA
- 8 - BAIXA QUALIDADE ÓSSEA

VOCÊ MUDARIA A OPÇÃO DE TRATAMENTO APÓS CLASSIFICAR ESTÁ FRATURA POR AO/OTA 2018:

- SIM, MUDARIA MEU TRATAMENTO
- NÃO, MANTERIA O TRATAMENTO ANTERIOR

**Anexo 3** Tabela de concordância inter e intraobservador

| MÉDIA DE CONCORDÂNCIA INTEROBSERVADOR            |                                |                           |                                       |                                      |                                        |                           |
|--------------------------------------------------|--------------------------------|---------------------------|---------------------------------------|--------------------------------------|----------------------------------------|---------------------------|
|                                                  | CLASSIFICAÇÃO DE FERNANDEZ (%) | ESCOLHA DE TRATAMENTO (%) | CLASSIFICAÇÃO AO/OTA 2018 - RÁDIO (%) | CLASSIFICAÇÃO AO/OTA 2018 - ULNA (%) | CLASSIFICAÇÃO AO/OTA MODIFICADORES (%) | MUDANÇA DE TRATAMENTO (%) |
| 1                                                | 90                             | 60                        | 50                                    | 100                                  | 60                                     | 100                       |
| 2                                                | 90                             | 60                        | 70                                    | 100                                  | 50                                     | 90                        |
| 3                                                | 80                             | 80                        | 70                                    | 90                                   | 40                                     | 100                       |
| 4                                                | 50                             | 60                        | 40                                    | 100                                  | 70                                     | 90                        |
| 5                                                | 100                            | 50                        | 80                                    | 100                                  | 60                                     | 80                        |
| 6                                                | 70                             | 40                        | 50                                    | 90                                   | 50                                     | 100                       |
| 7                                                | 60                             | 50                        | 40                                    | 80                                   | 60                                     | 100                       |
| 8                                                | 70                             | 50                        | 50                                    | 100                                  | 50                                     | 100                       |
| 9                                                | 70                             | 70                        | 50                                    | 90                                   | 50                                     | 90                        |
| 10                                               | 80                             | 70                        | 70                                    | 90                                   | 40                                     | 100                       |
| 11                                               | 100                            | 80                        | 60                                    | 50                                   | 40                                     | 90                        |
| 12                                               | 100                            | 80                        | 70                                    | 90                                   | 40                                     | 100                       |
| 13                                               | 60                             | 70                        | 60                                    | 50                                   | 50                                     | 100                       |
| 14                                               | 90                             | 60                        | 80                                    | 90                                   | 40                                     | 100                       |
| 15                                               | 80                             | 50                        | 90                                    | 100                                  | 50                                     | 100                       |
| 16                                               | 50                             | 40                        | 40                                    | 60                                   | 70                                     | 100                       |
| 17                                               | 90                             | 60                        | 40                                    | 40                                   | 90                                     | 100                       |
| 18                                               | 40                             | 70                        | 50                                    | 90                                   | 40                                     | 100                       |
| 19                                               | 60                             | 80                        | 30                                    | 60                                   | 50                                     | 80                        |
| 20                                               | 50                             | 90                        | 40                                    | 80                                   | 50                                     | 100                       |
| 21                                               | 50                             | 80                        | 40                                    | 60                                   | 60                                     | 100                       |
| 22                                               | 80                             | 90                        | 30                                    | 100                                  | 70                                     | 100                       |
| 23                                               | 60                             | 80                        | 40                                    | 90                                   | 60                                     | 90                        |
| 24                                               | 100                            | 50                        | 70                                    | 100                                  | 40                                     | 90                        |
| 25                                               | 90                             | 60                        | 50                                    | 100                                  | 70                                     | 90                        |
| 26                                               | 100                            | 50                        | 60                                    | 100                                  | 70                                     | 100                       |
| 27                                               | 90                             | 70                        | 50                                    | 90                                   | 70                                     | 80                        |
| 28                                               | 40                             | 40                        | 100                                   | 50                                   | 60                                     | 100                       |
| 29                                               | 50                             | 40                        | 60                                    | 100                                  | 50                                     | 90                        |
| 30                                               | 60                             | 40                        | 80                                    | 80                                   | 50                                     | 100                       |
| 31                                               | 70                             | 50                        | 40                                    | 90                                   | 40                                     | 100                       |
| 32                                               | 60                             | 40                        | 40                                    | 90                                   | 40                                     | 100                       |
| 33                                               | 100                            | 60                        | 80                                    | 90                                   | 50                                     | 90                        |
| 34                                               | 100                            | 40                        | 60                                    | 80                                   | 40                                     | 100                       |
| 35                                               | 70                             | 50                        | 60                                    | 100                                  | 50                                     | 80                        |
| 36                                               | 100                            | 40                        | 60                                    | 70                                   | 60                                     | 100                       |
| 37                                               | 60                             | 50                        | 40                                    | 80                                   | 50                                     | 100                       |
| 38                                               | 90                             | 100                       | 40                                    | 80                                   | 60                                     | 100                       |
| 39                                               | 70                             | 70                        | 70                                    | 50                                   | 50                                     | 100                       |
| 40                                               | 60                             | 60                        | 80                                    | 80                                   | 60                                     | 100                       |
| 41                                               | 70                             | 60                        | 60                                    | 80                                   | 50                                     | 100                       |
| 42                                               | 100                            | 70                        | 100                                   | 70                                   | 60                                     | 90                        |
| 43                                               | 70                             | 80                        | 70                                    | 90                                   | 50                                     | 90                        |
| 44                                               | 90                             | 70                        | 90                                    | 80                                   | 40                                     | 90                        |
| 45                                               | 90                             | 50                        | 70                                    | 40                                   | 50                                     | 90                        |
| 46                                               | 90                             | 70                        | 70                                    | 70                                   | 50                                     | 100                       |
| 47                                               | 90                             | 60                        | 50                                    | 50                                   | 50                                     | 90                        |
| 48                                               | 90                             | 80                        | 50                                    | 80                                   | 50                                     | 100                       |
| 49                                               | 80                             | 90                        | 50                                    | 80                                   | 40                                     | 100                       |
| 50                                               | 70                             | 50                        | 70                                    | 90                                   | 40                                     | 90                        |
| <b>MÉDIA DE CONCORDÂNCIA INTEROBSERVADOR (%)</b> | <b>76,4</b>                    | <b>62</b>                 | <b>59,2</b>                           | <b>81,200</b>                        | <b>52,6</b>                            | <b>95,4</b>               |

| MÉDIA DE CONCORDÂNCIA INTRAOBSERVADOR            |                             |                |                                       |                                      |                                                |                             |
|--------------------------------------------------|-----------------------------|----------------|---------------------------------------|--------------------------------------|------------------------------------------------|-----------------------------|
| AVALIADORES                                      | CLASSIFICAÇÃO FERNANDEZ (%) | TRATAMENTO (%) | CLASSIFICAÇÃO AO/OTA 2018 - RÁDIO (%) | CLASSIFICAÇÃO AO/OTA 2018 - ULNA (%) | CLASSIFICAÇÃO AO/OTA 2018 - MODIFICADORES* (%) | MUDANÇA NO TRATAMENTO** (%) |
| 1                                                | 77,78                       | 44,44          | 44,44                                 | 100                                  | 33,33                                          | 100                         |
| 2                                                | 100                         | 55,56          | 88,89                                 | 88,89                                | 44,44                                          | 100                         |
| 3                                                | 77,78                       | 66,67          | 33,33                                 | 88,89                                | 66,67                                          | 88,89                       |
| 4                                                | 55,56                       | 44,44          | 44,44                                 | 100                                  | 44,44                                          | 100                         |
| 5                                                | 88,89                       | 33,33          | 55,56                                 | 100                                  | 33,33                                          | 100                         |
| 6                                                | 77,78                       | 33,33          | 55,56                                 | 66,67                                | 33,33                                          | 100                         |
| 7                                                | 44,44                       | 33,33          | 33,33                                 | 100                                  | 33,33                                          | 88,89                       |
| 8                                                | 88,89                       | 55,56          | 44,44                                 | 88,89                                | 66,67                                          | 100                         |
| 9                                                | 77,78                       | 77,78          | 55,56                                 | 100                                  | 33,33                                          | 8,89                        |
| 10                                               | 77,78                       | 77,78          | 44,44                                 | 88,89                                | 33,33                                          | 100                         |
| 11                                               | 77,78                       | 66,67          | 55,56                                 | 55,56                                | 55,56                                          | 100                         |
| 12                                               | 100                         | 66,67          | 77,78                                 | 88,89                                | 44,44                                          | 100                         |
| 13                                               | 77,78                       | 66,67          | 44,44                                 | 66,67                                | 33,33                                          | 88,89                       |
| 14                                               | 88,89                       | 55,56          | 55,56                                 | 88,89                                | 44,44                                          | 88,89                       |
| 15                                               | 100                         | 55,56          | 88,89                                 | 66,67                                | 77,78                                          | 100                         |
| 16                                               | 55,56                       | 44,44          | 33,33                                 | 55,56                                | 33,33                                          | 88,89                       |
| 17                                               | 88,89                       | 55,56          | 55,56                                 | 66,67                                | 33,33                                          | 100                         |
| 18                                               | 33,33                       | 44,44          | 55,56                                 | 88,89                                | 44,44                                          | 100                         |
| 19                                               | 55,55                       | 77,78          | 33,33                                 | 44,44                                | 33,33                                          | 88,89                       |
| 20                                               | 66,67                       | 55,56          | 44,44                                 | 88,89                                | 44,44                                          | 100                         |
| 21                                               | 55,56                       | 88,89          | 44,44                                 | 88,89                                | 66,67                                          | 100                         |
| 22                                               | 77,78                       | 77,78          | 33,33                                 | 100                                  | 44,44                                          | 88,89                       |
| 23                                               | 66,67                       | 55,56          | 44,44                                 | 88,89                                | 55,56                                          | 100                         |
| 24                                               | 77,78                       | 55,56          | 66,67                                 | 100                                  | 55,56                                          | 100                         |
| 25                                               | 88,89                       | 66,67          | 55,56                                 | 77,76                                | 55,56                                          | 100                         |
| 26                                               | 100                         | 55,56          | 55,56                                 | 88,89                                | 55,56                                          | 100                         |
| 27                                               | 100                         | 66,67          | 55,56                                 | 88,89                                | 55,56                                          | 100                         |
| 28                                               | 44,44                       | 55,56          | 66,67                                 | 44,44                                | 55,56                                          | 100                         |
| 29                                               | 55,56                       | 55,56          | 66,67                                 | 77,78                                | 44,44                                          | 88,89                       |
| 30                                               | 100                         | 55,56          | 77,78                                 | 88,89                                | 44,44                                          | 88,89                       |
| 31                                               | 55,56                       | 66,67          | 33,33                                 | 55,56                                | 33,33                                          | 100                         |
| 32                                               | 100                         | 66,67          | 77,76                                 | 88,89                                | 66,67                                          | 88,89                       |
| 33                                               | 100                         | 44,44          | 77,76                                 | 55,56                                | 66,67                                          | 100                         |
| 34                                               | 100                         | 44,44          | 66,67                                 | 66,67                                | 88,89                                          | 100                         |
| 35                                               | 66,67                       | 66,67          | 55,56                                 | 88,89                                | 55,56                                          | 100                         |
| 36                                               | 100                         | 66,67          | 66,67                                 | 77,78                                | 44,44                                          | 88,89                       |
| 37                                               | 66,67                       | 55,56          | 33,33                                 | 77,78                                | 44,44                                          | 100                         |
| 38                                               | 77,78                       | 77,78          | 44,44                                 | 77,78                                | 44,44                                          | 88,89                       |
| 39                                               | 55,56                       | 66,67          | 55,56                                 | 55,56                                | 66,67                                          | 100                         |
| 40                                               | 66,67                       | 66,67          | 66,67                                 | 77,78                                | 77,78                                          | 100                         |
| 41                                               | 55,56                       | 55,56          | 100                                   | 88,89                                | 44,44                                          | 88,89                       |
| 42                                               | 100                         | 77,78          | 66,67                                 | 66,67                                | 55,56                                          | 100                         |
| 43                                               | 55,56                       | 77,78          | 66,67                                 | 88,89                                | 55,56                                          | 88,89                       |
| 44                                               | 88,89                       | 77,78          | 77,76                                 | 100                                  | 55,56                                          | 100                         |
| 45                                               | 77,78                       | 66,67          | 55,56                                 | 88,89                                | 55,56                                          | 88,89                       |
| 46                                               | 100                         | 55,56          | 77,76                                 | 44,44                                | 66,67                                          | 77,76                       |
| 47                                               | 77,78                       | 88,89          | 55,56                                 | 66,67                                | 33,33                                          | 100                         |
| 48                                               | 88,89                       | 88,89          | 33,33                                 | 88,89                                | 33,33                                          | 100                         |
| 49                                               | 88,89                       | 55,56          | 33,33                                 | 88,89                                | 33,33                                          | 100                         |
| 50                                               | 66,67                       | 77,76          | 77,78                                 | 100                                  | 55,56                                          | 88,89                       |
| <b>MÉDIA DE CONCORDÂNCIA INTRAOBSERVADOR (%)</b> | <b>77,3348</b>              | <b>61,7794</b> | <b>56,6658</b>                        | <b>80,4454</b>                       | <b>49,5552</b>                                 | <b>94,1778</b>              |
